# Supplementary material
Source: Royal Society of Chemistry journal article supplement (doi:10.1039/d6nj01384h)
Supplement: d6nj01384h1.pdf [file d6nj01384h1.pdf]

## Supporting Information

### Tables

**Table S1** Imaginary frequencies of the transition states, bonds corresponding to relative normal vibrations.

| Transition States | Imaginary frequency (cm <sup>-1</sup> ) | Bonds corresponding to relative normal vibrations |
|-------------------|-----------------------------------------|---------------------------------------------------|
| TS1a              | -636.84                                 | C-H, N-H                                          |
| TS2b              | -1035.19                                | C-H, N-H                                          |
| TS3c              | -1326.52                                | C-O, O-H                                          |
| TS4d              | -825.46                                 | C-O, O-H                                          |

**Table S2** Relative energy of Intermediate and transition states.

| Transition States | Relative energy (kJ/mol) |
|-------------------|--------------------------|
| IM1a              | -163.85                  |
| TS1a              | -121.46                  |
| Product-a         | -184.49                  |
| IM1b              | -204.89                  |
| TS1b              | -139.53                  |
| Product-b         | -239.04                  |
| IM1c              | -129.29                  |
| TS1c              | -28.28                   |
| Product-c         | -152.81                  |
| IM1d              | -95.11                   |
| TS1d              | -8.82                    |
| Product-d         | -136.44                  |
